# Supplementary material
Source: PubMed Central journal article supplement (PMC6498442)

# Visible Light-Promoted Alkylation of Polar $\pi$ -Bonds (C=O and C=N) Using Potassium Organotrifluoroborates

Davis P. Plasko, Christopher J. Jordan, Brittney E. Ciesa, Madison A. Merrill  
and James M. Hanna, Jr.\*

*Department of Chemistry, Physics, and Geology, Winthrop University, Sims Science Building, Rock Hill, SC 29733*

## SUPPLEMENTARY INFORMATION

|                                                 |   |
|-------------------------------------------------|---|
| General Information.....                        | 2 |
| General Procedure for Alkylation of Imines..... | 2 |
| Photoreactor Setup (Figure S1).....             | 3 |
| Blue LED Emission Spectrum (Figure S2).....     | 3 |
| Compound Data for Amines ( <b>3</b> ) .....     | 4 |
| Preparation of <b>4</b> .....                   | 6 |
| Light-Dark Experiment.....                      | 7 |
| References.....                                 | 8 |
| Compound Spectra.....                           | 9 |

## General Information

Unless otherwise noted, all reagents were purchased from commercial sources and used as received. *N*-(Benzylidene)aniline (**2a**) was prepared according to the method of Bigelow and Eatough.<sup>1</sup> Solvents were degassed and dried using a PureSolv Solvent Purification System by Innovative Technology. Melting points were measured on an Electrothermal IA9100 digital melting point apparatus and are uncorrected. <sup>1</sup>H NMR spectra were obtained at 300 MHz or 400 MHz; <sup>13</sup>C NMR spectra were obtained at 75 MHz or 100 MHz. Chemical shifts are reported in parts per million ( $\delta$ ) using the solvent residual proton or carbon signal (CDCl<sub>3</sub>:  $\delta$ H 7.26 ppm,  $\delta$ C 77.3 ppm; d<sub>6</sub>-DMSO:  $\delta$ H 2.50 ppm,  $\delta$ C 39.5 ppm) as an internal reference. FTIR spectra were recorded on a ThermoScientific Nicolet iS10 or Avatar 370 spectrometer. GC/EI-MS analyses were performed on an Agilent Technologies 7890 GC equipped with 30 m x 0.32 mm Agilent HP-5 column coupled to an Agilent Technologies 5975C MSD. Flash column chromatography was carried out using silica gel (grade 60, 230 – 400 mesh). Feit 16 W PAR 38 blue LED reflector floodlights were purchased from Amazon.com; the emission spectrum was measured with an Ocean Optics Red Tide USB650 spectrophotometer.

### General Procedure for Visible Light-Promoted Alkylation of Imines.

An appropriate potassium organotrifluoroborate (**1**, 0.38 mmol), **2a** (0.25 mmol), *Ir-dF(CF<sub>3</sub>)-dtb* (7.1 mg, 0.0063 mmol, 2.5 mol %), and CH<sub>2</sub>Cl<sub>2</sub> (5 mL) were added to an oven dried 25 mL Schlenk tube equipped with a Teflon stir bar and rubber septum. The solution was sparged with argon for 15 minutes, and then placed between two Feit 16 W blue LED floodlights (~9 cm away, Figure S1; emission spectrum shown in Figure S2). Unless otherwise indicated, the solution was illuminated with stirring for 46 h; the temperature was maintained at approximately 30 °C by a fan blowing across the reaction vessel. The reaction mixture was quenched with saturated aqueous NH<sub>4</sub>Cl (20 mL), and extracted with (3 x 10 mL) of CH<sub>2</sub>Cl<sub>2</sub>. The combined organic layers were dried (Na<sub>2</sub>SO<sub>4</sub>), evaporated, and purified by flash column chromatography (hexanes/ethyl acetate) to give the product.

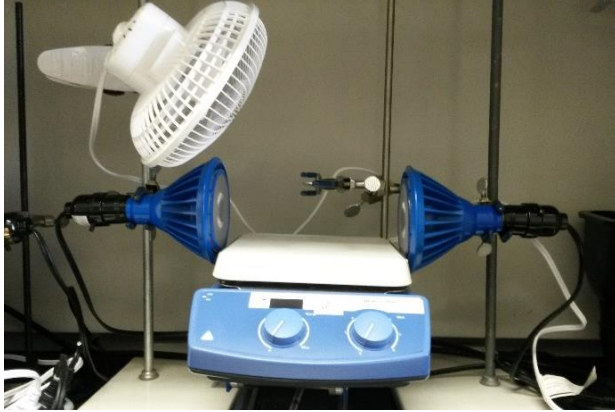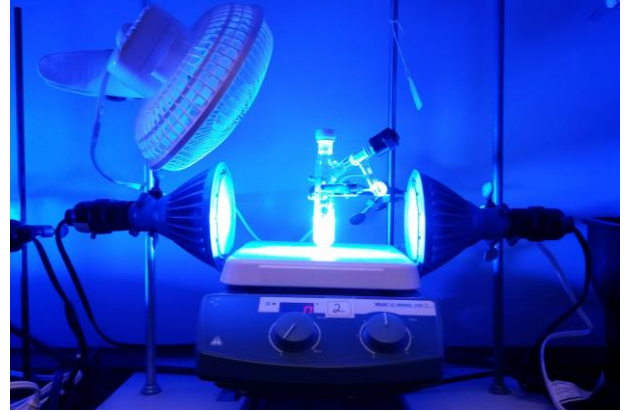

Figure S1

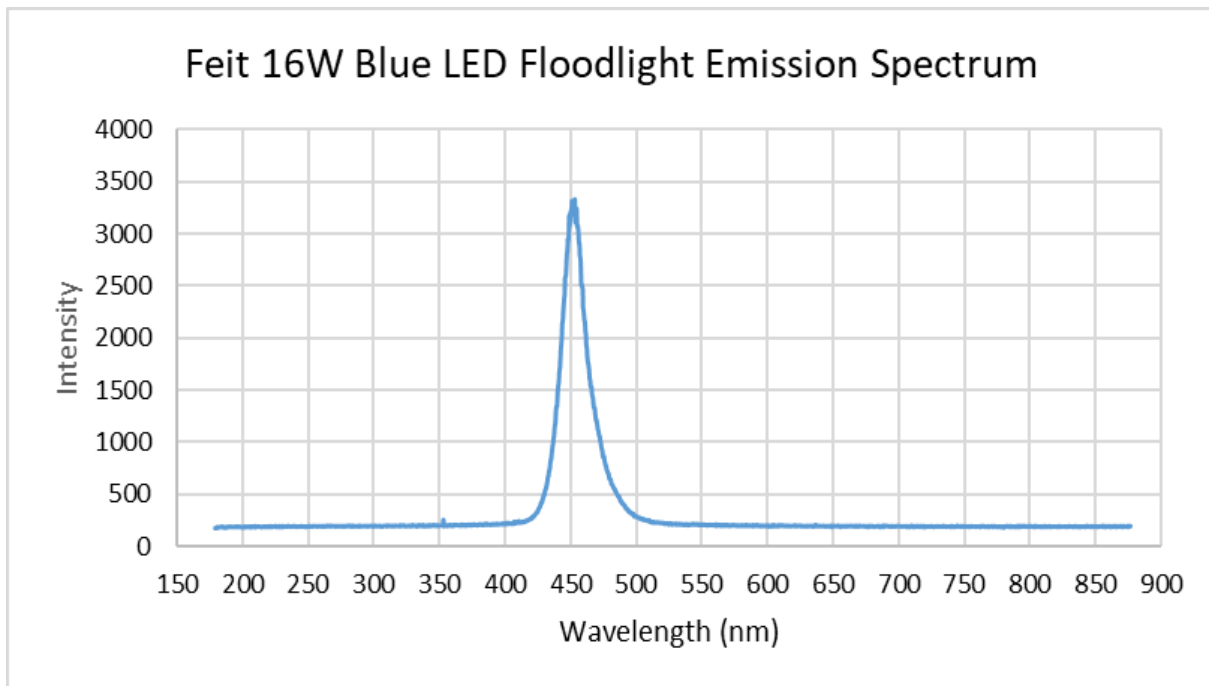

Figure S2

### Compound Data for Amines (3)

#### *N*-(1,2-Diphenylethyl)aniline (3a).

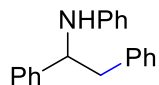

Pale yellow oil. Yield: 70%.  $^1\text{H-NMR}$  ( $\text{CDCl}_3$ , 300 MHz):  $\delta$  7.38-7.19 (m, 8H), 7.18-7.11 (m, 2H), 7.10-7.02 (m, 2H), 6.68-6.61 (m, 1H), 6.51-6.44 (m, 2H), 4.62-4.56 (m, 1H), 4.12 (br s, 1H), 3.20-2.97 (m, 2H).  $^{13}\text{C-NMR}$  ( $\text{CDCl}_3$ , 75 MHz):  $\delta$  147.4, 143.5, 137.8, 129.3, 129.1, 128.7, 128.6, 127.1, 126.8, 126.5, 117.6, 113.7, 59.3, 45.3. EI-MS:  $m/z$  273 ( $\text{M}^+$ , 1), 183 (32), 182 (100), 180 (20), 104 (30), 91 (17), 77 (49). These data are in agreement with reported literature data.<sup>2</sup>

#### *N*-(1-Phenyl-3-buten-1-yl)aniline (3b)

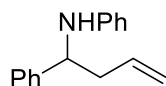

Orange oil. Yield: 70%.  $^1\text{H-NMR}$  ( $\text{CDCl}_3$ , 300 MHz):  $\delta$  7.49-7.20 (m, 5H), 7.16-7.04 (m, 2H), 6.72-6.61 (m, 1H), 6.56-6.46 (m, 2H), 5.86-5.68 (m, 1H), 5.26-5.12 (m, 2H), 4.45-4.36 (m, 1H), 4.18 (br s, 1H), 2.69-2.42 (m, 2H).  $^{13}\text{C-NMR}$  ( $\text{CDCl}_3$ , 75 MHz):  $\delta$  147.4, 143.6, 134.7, 129.1, 128.7, 127.1, 126.4, 118.4, 117.4, 113.6, 57.2, 43.4. IR (ATR): 3407  $\text{cm}^{-1}$  (N-H). EI-MS:  $m/z$  223 ( $\text{M}^+$ , 2), 183 (18), 182 (100), 104 (23), 77 (39). These data are in agreement with reported literature data.<sup>2</sup>

#### *N*-(1-Cyclohexyl-1-phenylmethyl)aniline (3c)

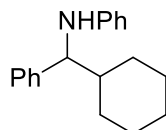

Orange oil. Yield: 72%.  $^1\text{H-NMR}$  ( $\text{CDCl}_3$ , 300 MHz):  $\delta$  7.31-7.16 (m, 5H), 7.10-7.01 (m, 2H), 6.64-6.56 (m, 1H), 6.52-6.45 (m, 2H), 5.86-5.68 (m, 1H), 4.15 (br s, 1H), 4.11 (d,  $J = 6.3$  Hz, 1H), 4.18 (br s, 1H), 1.94-1.44 (m, 6H), 1.30-0.94 (m, 5H).  $^{13}\text{C-NMR}$  ( $\text{CDCl}_3$ , 75 MHz):  $\delta$  147.8, 142.7, 129.1, 128.3, 127.3, 126.8, 117.0, 113.2, 63.5, 45.0, 30.3, 29.5, 26.5, 26.5, 26.4. IR (ATR): 3422  $\text{cm}^{-1}$  (N-H). EI-MS:  $m/z$  265 ( $\text{M}^+$ , 3), 183 (18), 182 (100), 104 (15), 91 (13), 77 (25). These data are in agreement with reported literature data.<sup>3</sup>

*N*-(1-Cyclobutyl-1-phenylmethyl)aniline (**3e**)

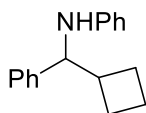

Pale yellow oil. Yield: 50%. <sup>1</sup>H-NMR (CDCl<sub>3</sub>, 400 MHz): δ 7.40-7.46 (m, 4H), 7.20 (t, *J* = 7.0 Hz, 1H), 7.05 (t, *J* = 7.6 Hz, 2H), 6.61 (t, *J* = 7.3 Hz, 1H), 6.49 (d, *J* = 7.7 Hz, 2H), 4.16 (d, *J* = 8.8 Hz, 1H), 4.01 (br s, 1H), 2.59-2.46 (m, 1H), 2.19-2.07 (m, 1H), 1.96-1.73 (m, 5H). <sup>13</sup>C-NMR (CDCl<sub>3</sub>, 100 MHz): δ 147.8, 142.6, 129.1, 128.5, 127.0, 126.6, 117.2, 113.4, 63.8, 42.6, 26.2, 25.6, 17.6. IR (ATR): 3410 cm<sup>-1</sup> (N-H). EI-MS: *m/z* 237 (M<sup>+</sup>, 6), 183 (14), 182 (100), 144 (12), 129 (17), 115 (20), 104 (12), 91 (25), 77 (30). HRMS calculated for C<sub>17</sub>H<sub>20</sub>N (M + H): 238.1590, found: 238.1590.

*N*-(1,3-Diphenylpropyl)aniline (**3f**)

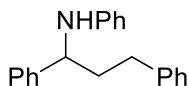

Illuminated for 168 h. Yellow oil. Yield: 41%. <sup>1</sup>H-NMR (CDCl<sub>3</sub>, 300 MHz): δ 7.37-7.13 (m, 10H), 7.08 (t, *J* = 7.5 Hz, 2H), 6.64 (t, *J* = 7.4 Hz, 1H), 6.49 (d, *J* = 8.5 Hz, 2H), 4.35 (t, *J* = 6.8 Hz, 1H), 4.12 (br s, 1H), 2.80-2.62 (m, 2H), 2.24-2.04 (m, 2H). <sup>13</sup>C-NMR (CDCl<sub>3</sub>, 75 MHz): δ 147.2, 143.8, 141.5, 129.2, 128.7, 128.6, 128.5, 127.1, 126.6, 126.1, 117.5, 113.5, 57.9, 40.2, 32.7. IR (ATR): 3409 cm<sup>-1</sup> (N-H). EI-MS: *m/z* 287 (M<sup>+</sup>, 4), 194 (16), 183 (18), 182 (100), 115 (15), 104 (20), 93 (17), 91 (55), 77 (32). These data are in agreement with reported literature data.<sup>4</sup>

*N*-(2,2-Dimethyl-1-phenylpropyl)aniline (**3g**)

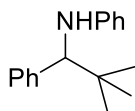

Orange oil. Yield: 72%. <sup>1</sup>H-NMR (CDCl<sub>3</sub>, 300 MHz): δ 7.35-7.17 (m, 5H), 7.05 (t, *J* = 7.4 Hz, 2H), 6.59 (t, *J* = 7.4 Hz, 1H), 6.49 (d, *J* = 7.7 Hz, 2H), 4.26 (br s, 1H), 4.05 (s, 1H), 1.00 (s, 9H). <sup>13</sup>C-NMR (CDCl<sub>3</sub>, 75 MHz): δ 147.8, 141.3, 129.1, 128.6, 127.8, 126.9, 117.0, 113.3, 67.3, 35.0, 27.2. IR (ATR): 3438 cm<sup>-1</sup> (N-H). EI-MS: *m/z* 239 (M<sup>+</sup>, 3), 183 (22), 182 (100), 181 (36), 180 (47), 104 (24), 77 (55). These data are in agreement with reported literature data.<sup>5</sup>

*N*-(2-Phenoxy-1-phenylethyl)aniline (**3h**)

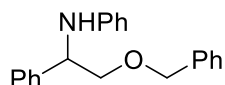

Yellow oil. Yield: 61%. <sup>1</sup>H-NMR (CDCl<sub>3</sub>, 300 MHz): δ 7.45-7.22 (m, 10H), 7.05 (t, *J* = 8.0 Hz, 2H), 6.67 (t, *J* = 7.3 Hz, 2H), 6.52 (d, *J* = 7.7 Hz, 2H), 4.83-4.49 (m, 4H), 3.74 (dd, *J* = 10.0, 4.0 Hz, 1H), 3.59 (t, *J* = 9.2 Hz, 1H). <sup>13</sup>C-NMR (CDCl<sub>3</sub>, 100 MHz): δ 147.4, 140.6, 137.9, 129.1, 128.8, 128.6, 127.9, 127.8, 127.6, 127.0, 118.0, 114.3, 74.4, 73.1, 58.5. IR (ATR): 3391 cm<sup>-1</sup> (N-H). EI-MS: *m/z* 303 (M<sup>+</sup>, 5), 183 (37), 182 (100), 180 (13), 104 (34), 91 (45), 77 (50). HRMS calculated for C<sub>21</sub>H<sub>22</sub>NO (M + H): 304.1696, found: 304.1697.

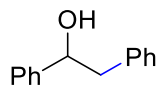

*1,2*-Diphenylethanol (**4**)

Potassium benzyltrifluoroborate (**1a**, 75.2 mg, 0.38 mmol), diphenyl phosphate (*Ir-dF*(CF<sub>3</sub>)-*dtb* (7.1 mg, 0.0063 mmol, 2.5 mol %), and CH<sub>2</sub>Cl<sub>2</sub> (5 mL) were added to an oven dried 25 mL Schlenk tube equipped with a Teflon stir bar and rubber septum. The vessel was sealed, then evacuated and purged with argon three times. Benzaldehyde (26.5 mg, 25.5 μL, 0.25 mmol) was added, followed by dry, degassed CH<sub>2</sub>Cl<sub>2</sub> (5 mL). The greenish yellow hazy mixture was placed between two Feit 16 W blue LED floodlights (~9 cm away, Figure S1; emission spectrum shown in Figure S2), and illuminated with stirring for 46 h; the temperature was maintained at approximately 30 °C by means of a fan.. The reaction mixture was quenched with saturated aqueous NaHCO<sub>3</sub> (20 mL), and extracted with (3 x 10 mL) of CH<sub>2</sub>Cl<sub>2</sub>. For determination of yield by NMR, the combined organic layers were dried (Na<sub>2</sub>SO<sub>4</sub>), a known amount of 1,3,5-trimethoxybenzene (~0.14 mmol) was added to the dried organic extract, and the solution was evaporated and analyzed by <sup>1</sup>H-NMR, using the integration ratio of the signals at 4.9 (**4**, dd, 1H) and 6.1 (C<sub>6</sub>H<sub>3</sub>(OCH<sub>3</sub>)<sub>3</sub>, s, 3H) to determine product yield. For product isolation, the combined organic layers were dried (Na<sub>2</sub>SO<sub>4</sub>), evaporated, and purified by flash column chromatography (hexanes/ethyl acetate) to give 19.8 mg (40%) of **4** as an off-white powder. Mp: 63-64 °C (lit.<sup>6</sup> 64 °C). <sup>1</sup>H-NMR (CDCl<sub>3</sub>, 300 MHz): δ 7.39-7.16 (m, 10H), 4.90 (dd, *J* = 8.3, 5.0 Hz, 1H), 3.08-2.92 (m, 2H), 1.80 (br s, 1H). <sup>13</sup>C-NMR (CDCl<sub>3</sub>, 100 MHz): δ 143.9, 138.1, 129.6, 128.6, 128.5, 127.7, 126.7, 126.0, 75.4, 46.2. IR (ATR): 3302 cm<sup>-1</sup> (O-H). EI-MS: *m/z* 198 (M<sup>+</sup>, 1), 181 (12), 180 (80), 179 (80), 178 (55), 176 (10), 165 (42), 152 (14), 107 (100), 105 (14). These data are in agreement with those reported in the literature.<sup>6</sup>

Light-Dark Experiment.

Potassium benzyltrifluoroborate (**1a**, 54.5 mg, 0.38 mmol), benzalaniline (**2a**, 45.4 mg, 0.25 mmol), **Ir-dF(CF<sub>3</sub>)-dtb** (7.1 mg, 0.0063 mmol, 2.5 mol %), and CH<sub>2</sub>Cl<sub>2</sub> (5 mL) were added to an oven dried 25 mL Schlenk tube equipped with a Teflon stir bar and rubber septum. Decane (145 μL) was added as an internal standard. The solution was sparged with argon for 15 minutes, then placed between two 16 W blue LEDs (~9 cm away, Figure S1). The solution was illuminated with stirring for a period of time (usually 10 min), and sampled for GC/MS analysis at the end of the illumination period. The solution was stirred in the dark (kept in a sealed cardboard box, usually 30 min), and sampled for GC/MS analysis at the end of the “dark” stir period. Progress of the reaction was measured by the ratio of GC area of product **3a** to GC area of decane (IS). Results are tabulated below.

| Time (min) | GC Area Ratio ( <b>3a</b> /IS) | Illumination (off/on) |
|------------|--------------------------------|-----------------------|
| 0          | 0.00                           | on                    |
| 10         | 0.22                           |                       |
| 10         | 0.22                           | off                   |
| 40         | 0.21                           |                       |
| 40         | 0.21                           | on                    |
| 50         | 0.44                           |                       |
| 50         | 0.44                           | off                   |
| 80         | 0.47                           |                       |
| 80         | 0.47                           | on                    |
| 90         | 0.62                           |                       |
| 90         | 0.62                           | off                   |
| 1050       | 0.60                           |                       |
| 1050       | 0.60                           | on                    |
| 1060       | 0.88                           |                       |
| 1060       | 0.88                           | off                   |
| 1090       | 0.84                           |                       |
| 1090       | 0.84                           | on                    |
| 1100       | 1.00                           |                       |
| 1100       | 1.00                           | off                   |
| 1130       | 1.04                           |                       |
| 1130       | 1.04                           | on                    |
| 1140       | 1.01                           |                       |
| 1140       | 1.01                           | off                   |
| 1170       | 1.04                           |                       |
| 1170       | 1.04                           | on                    |
| 1180       | 1.02                           |                       |

## References

1. Bigelow, L. A.; Eatough, H. *Org. Synth.* **1928**, *8*, 22-23.
2. Zhang, Y.; Yan, T.; Cheng, W.; Zuo, J.; Zhao, W. *Tetrahedron Lett.* **2009**, *50*, 2925-2928.
3. Shen, Z. L.; Cheong, H. L.; Loh, T. P. *Chem. Eur. J.* **2008**, *14*, 1875-1880.
4. Chen, N.; Dai, X. J.; Wang, H.; Li, C. J. *Angew. Chem. Int. Ed.* **2017**, *56*, 6260-6263.
5. Russell, G. A.; Wang, L.; Rajaratnam, R. *J. Org. Chem.* **1996**, *61*, 8988-8991.
6. Lewis, F. W.; McCabe, T. C.; Grayson, D. H. *Tetrahedron* **2011**, *67*, 7517-7528.



# COMPOUND SPECTRA

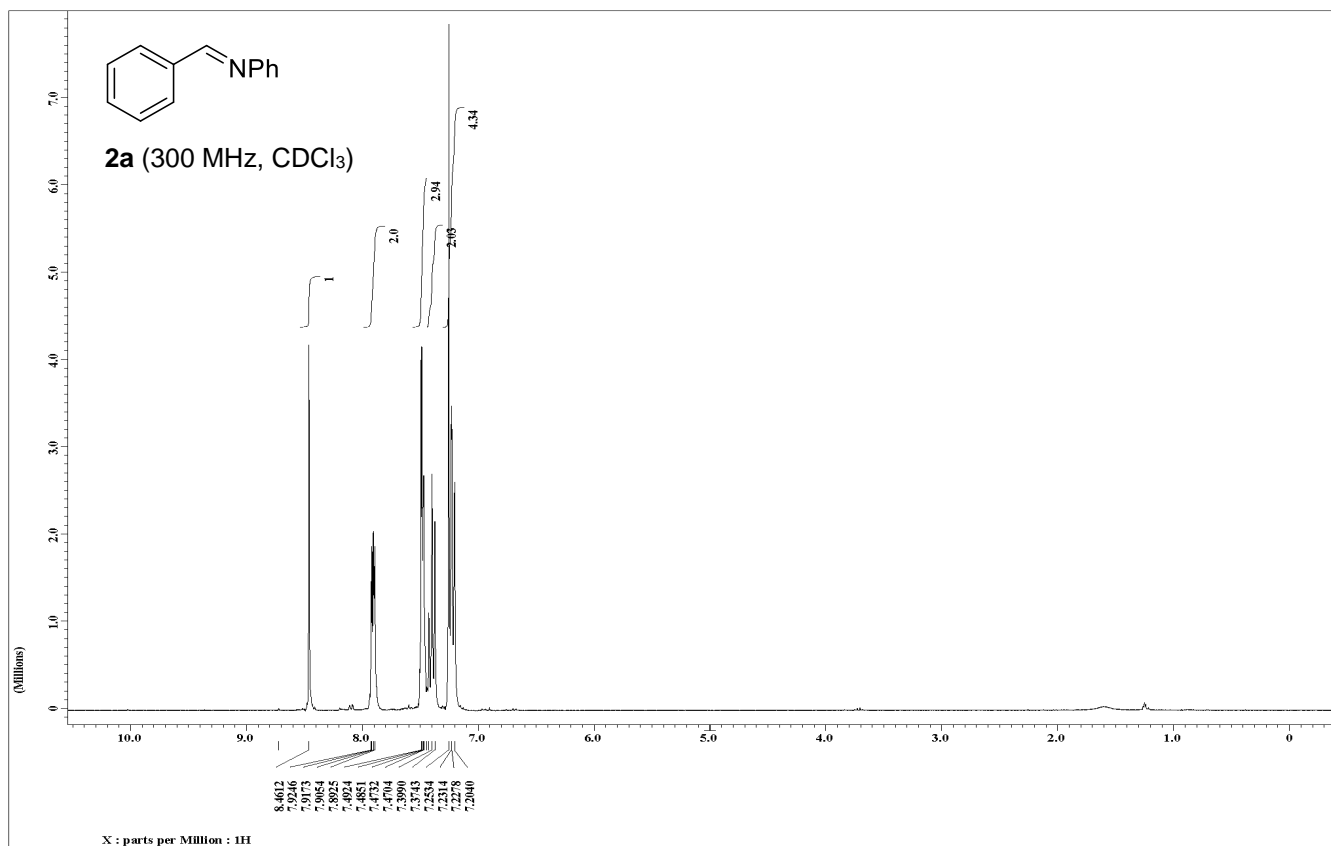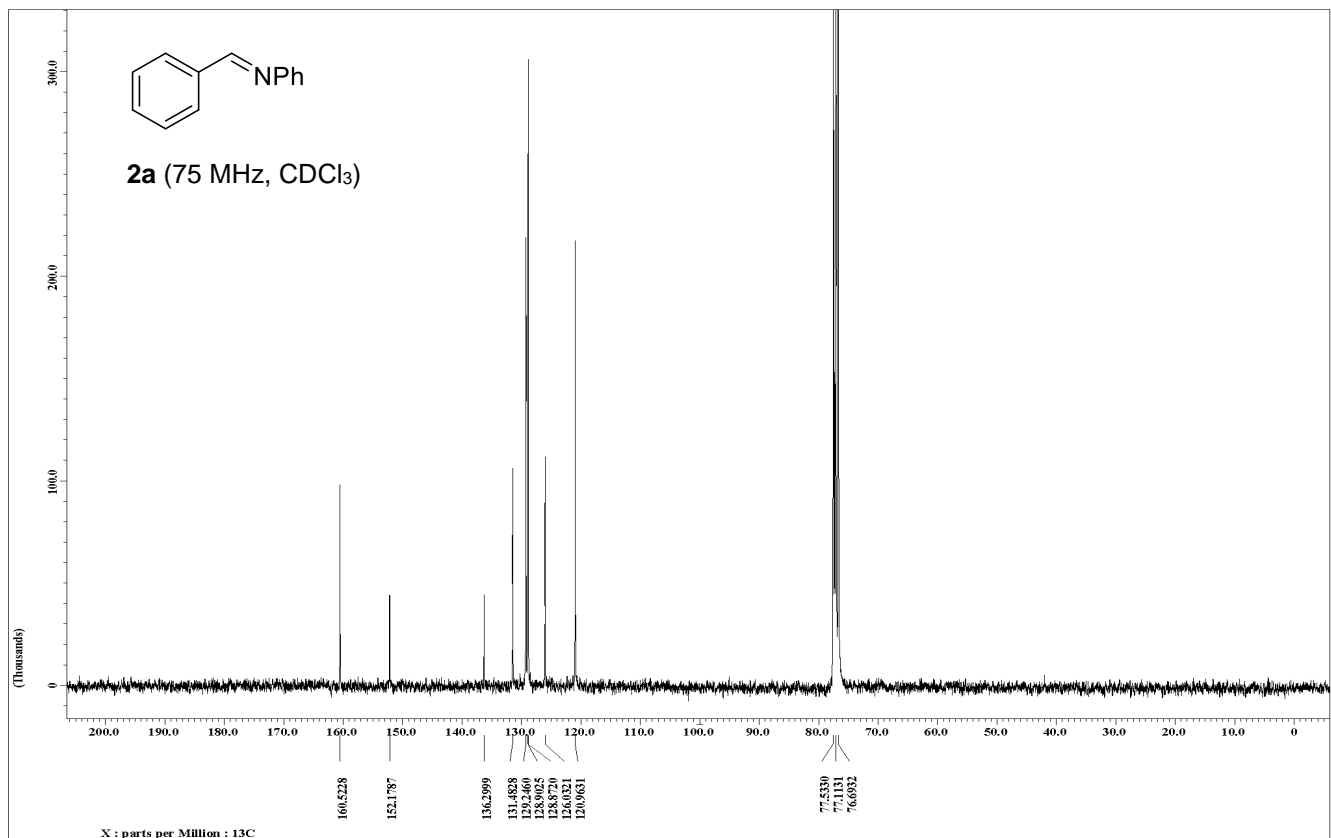

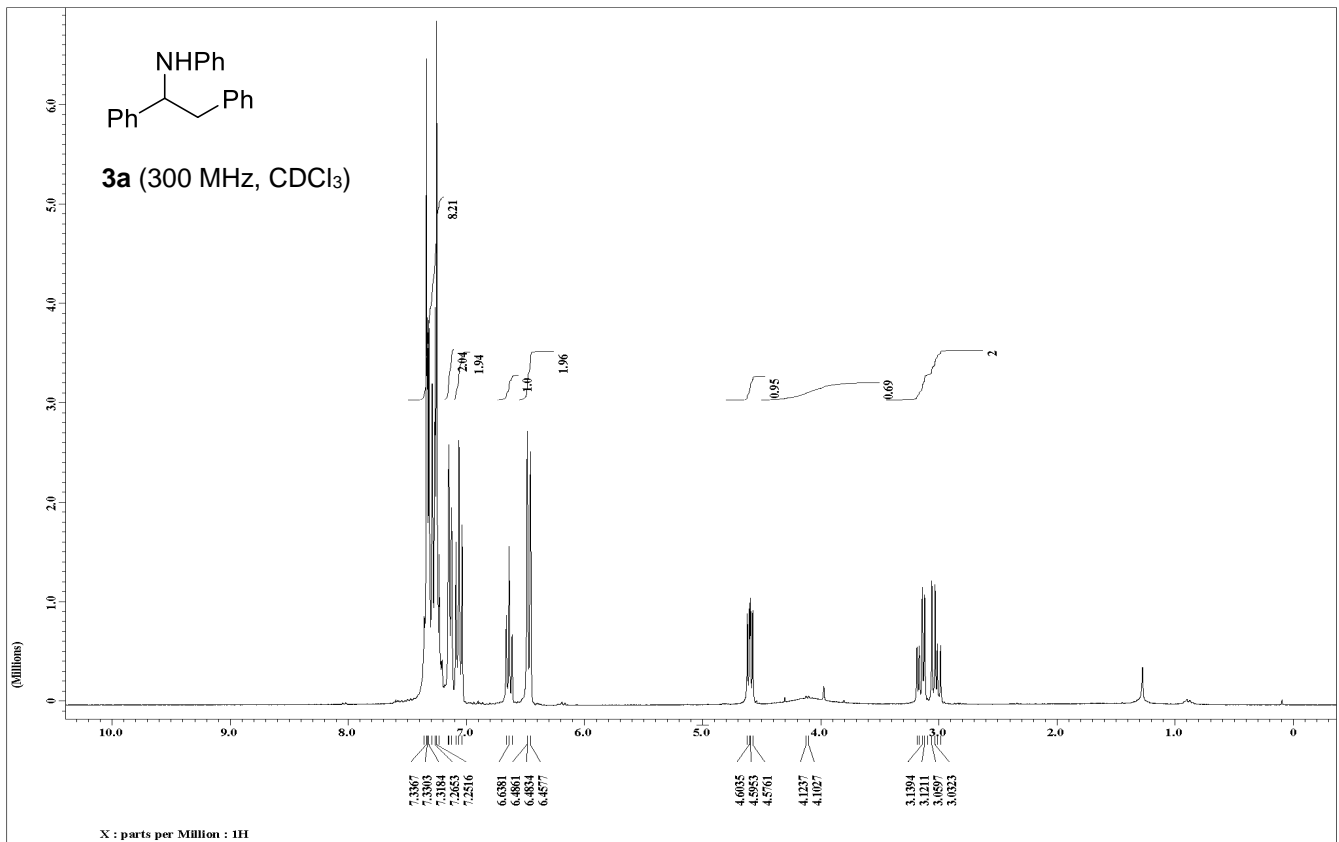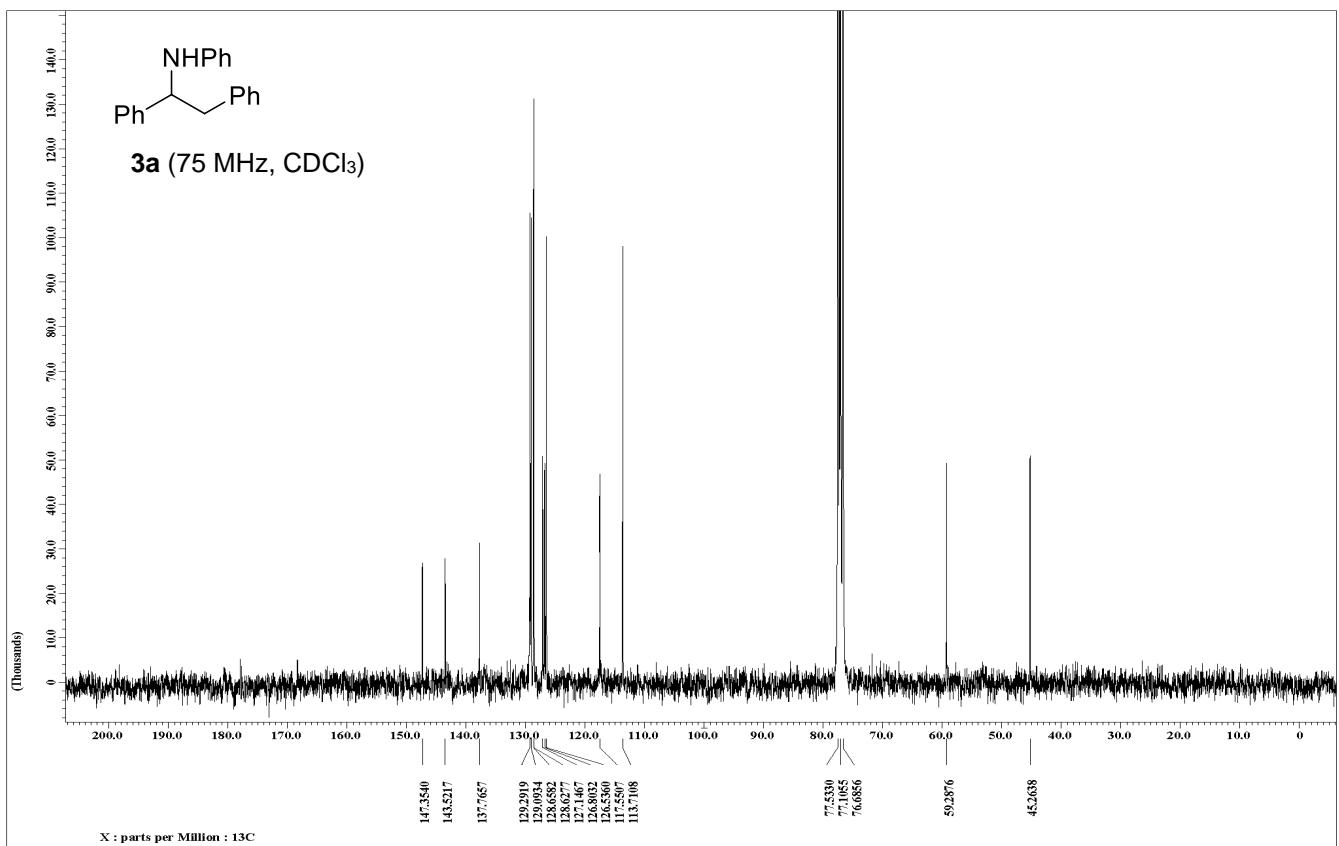

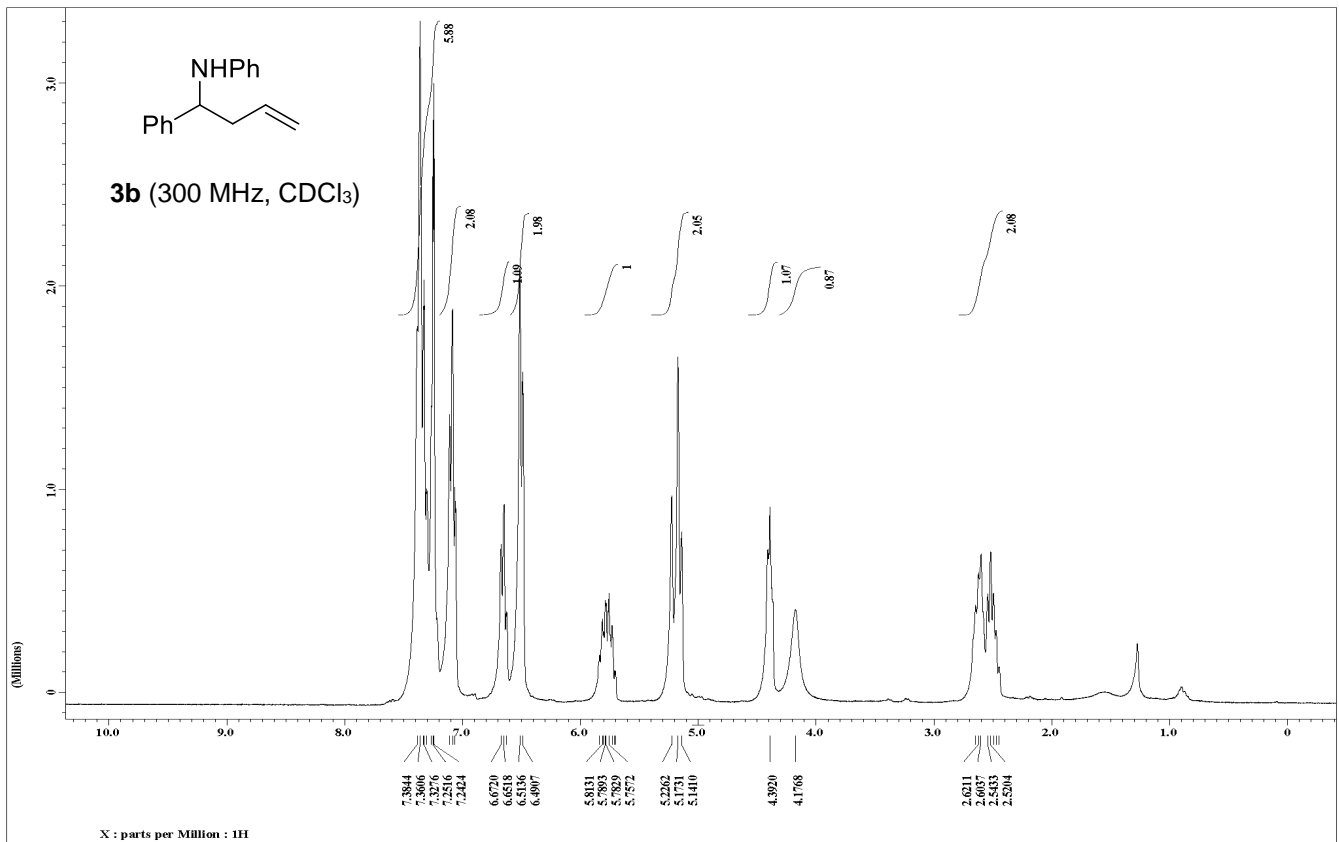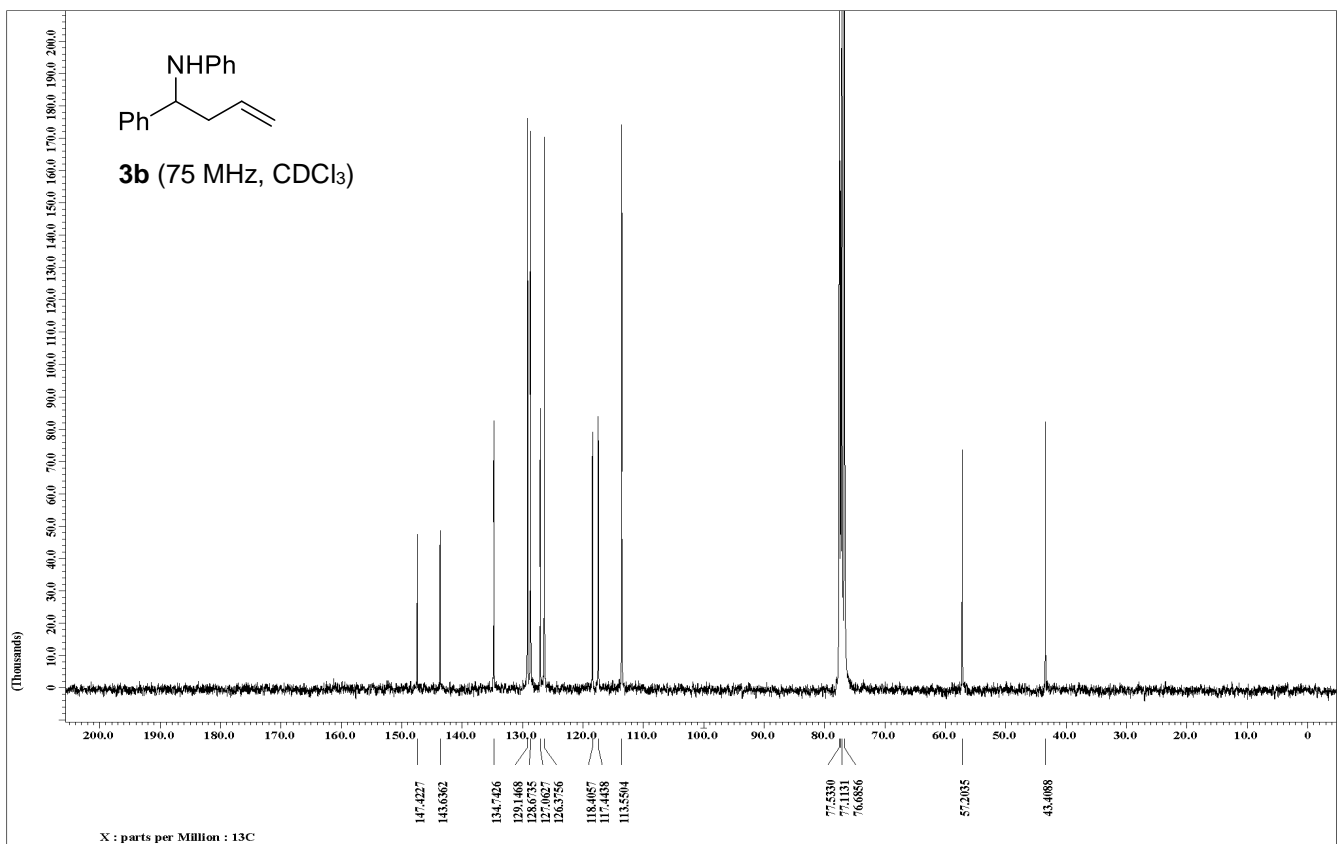

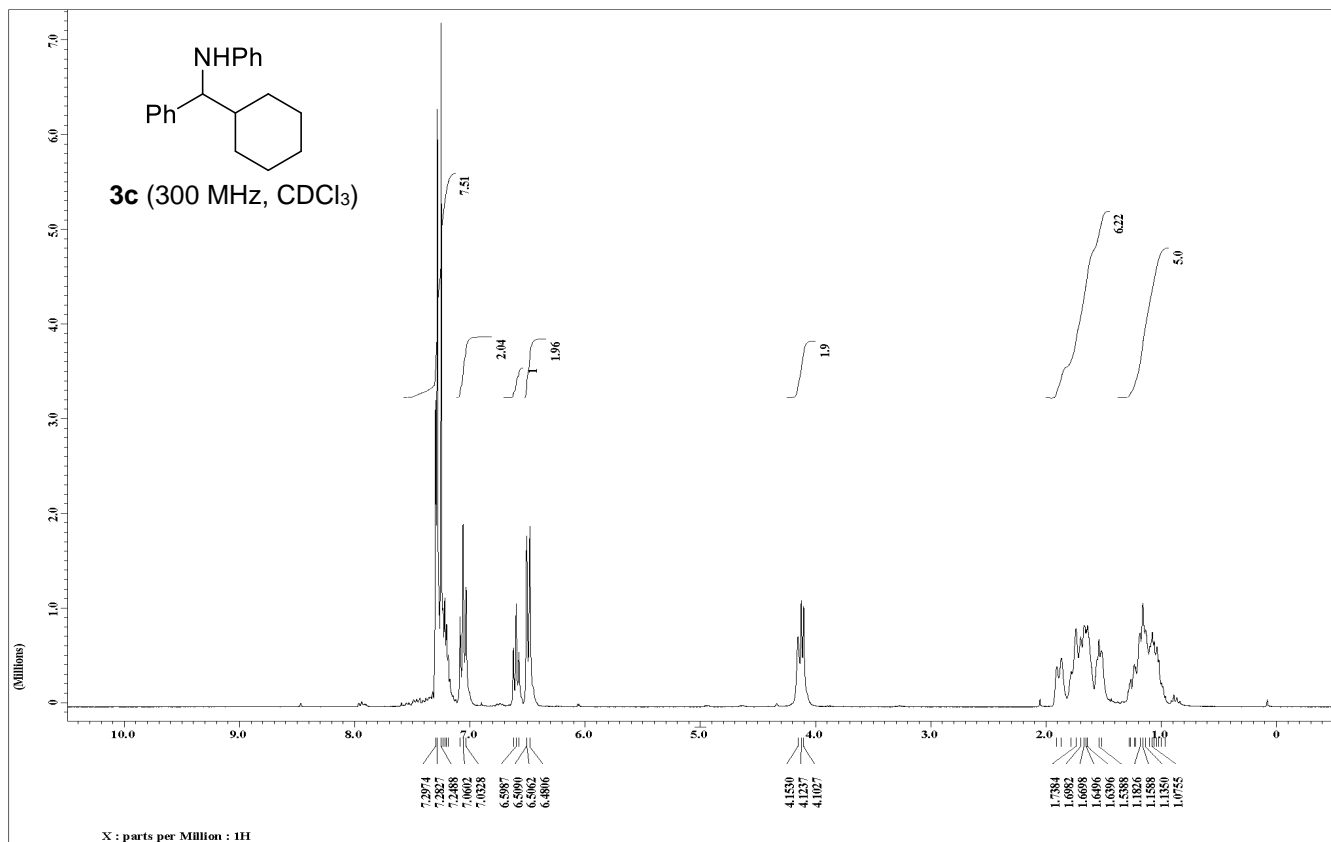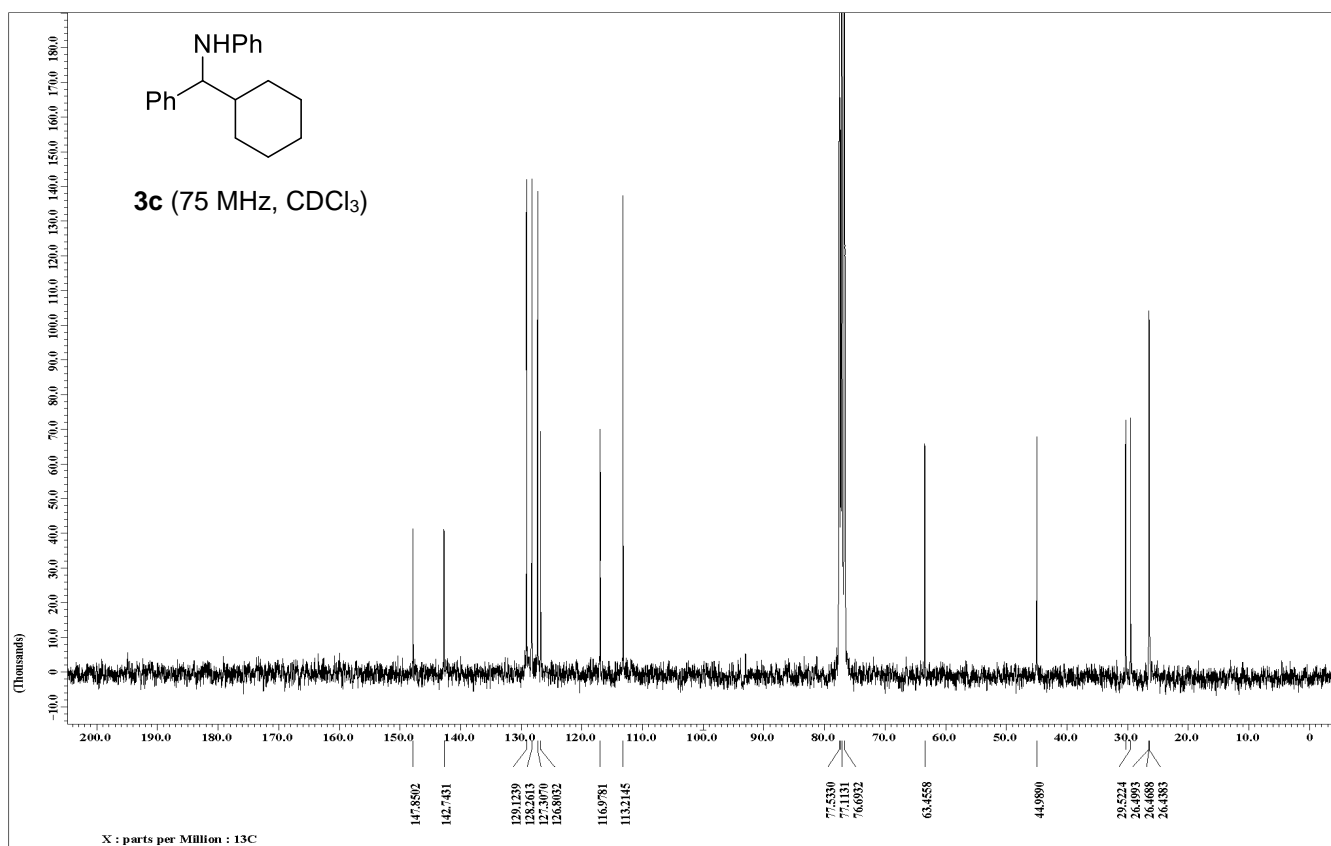

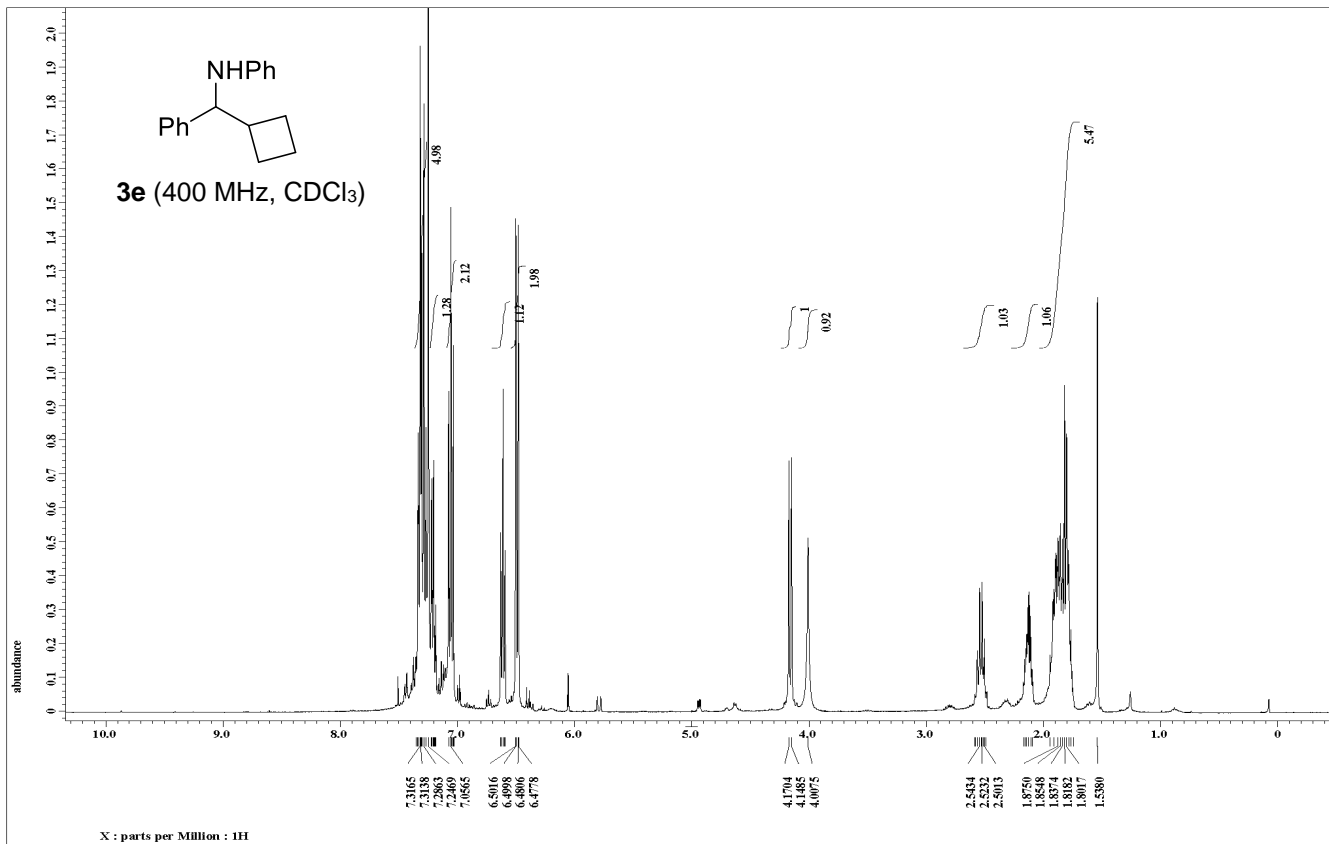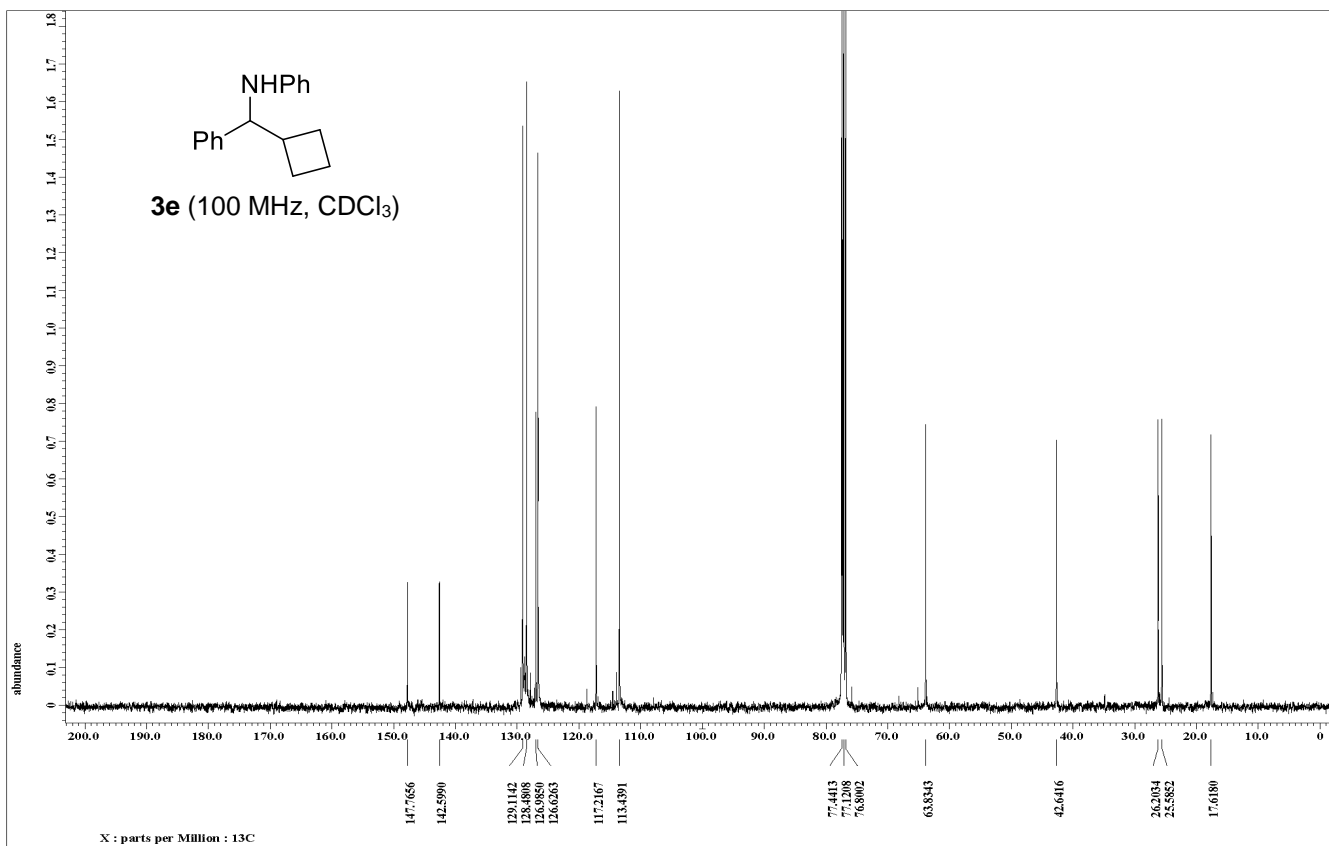

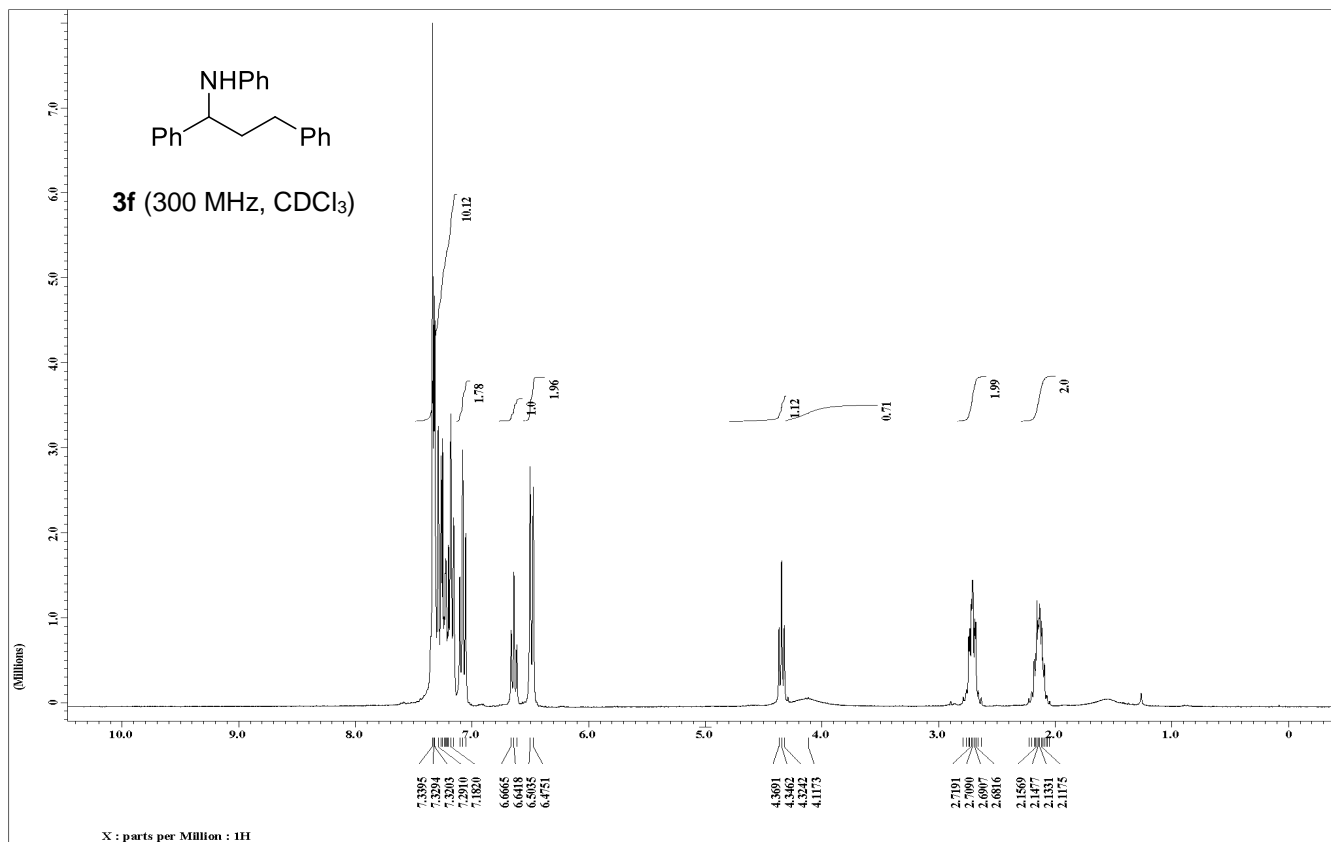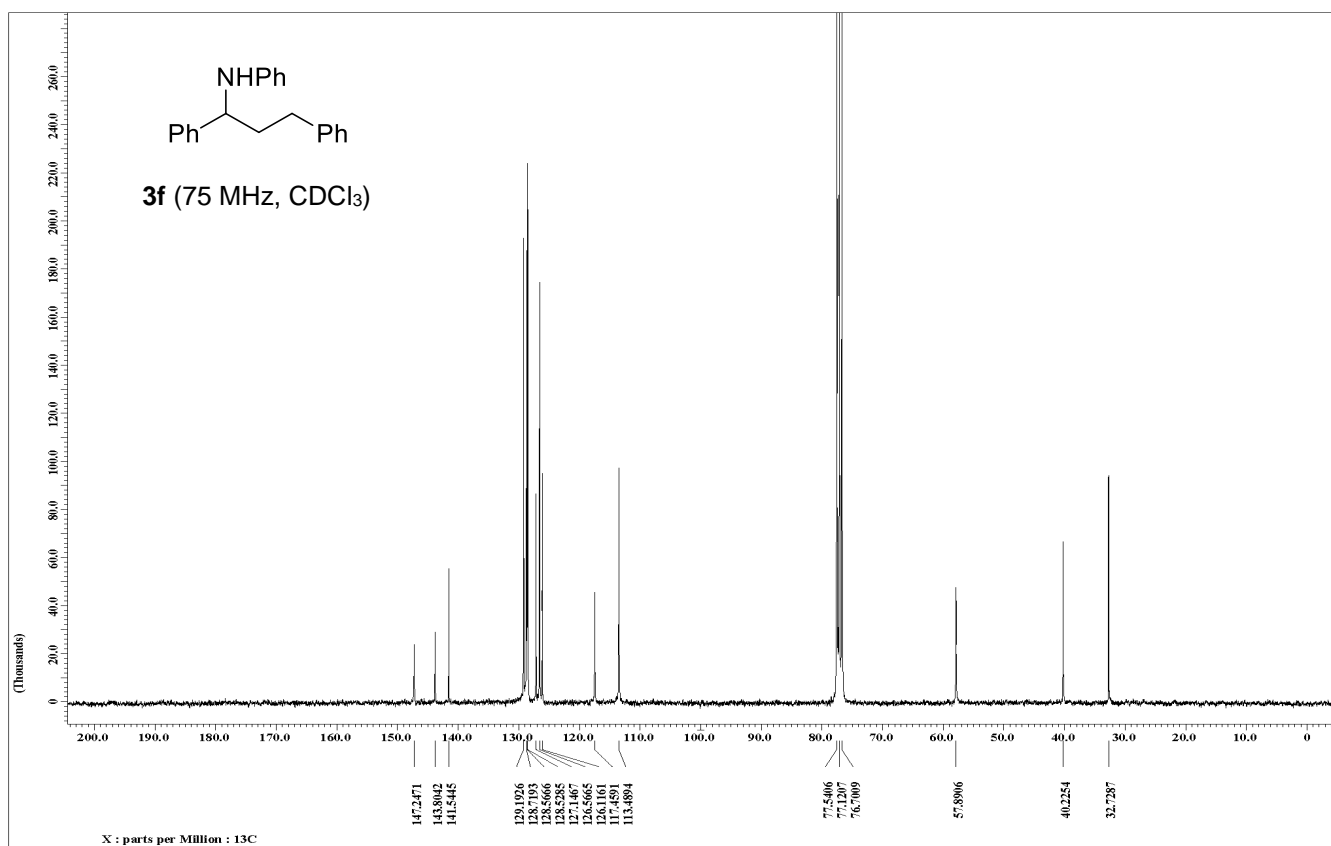

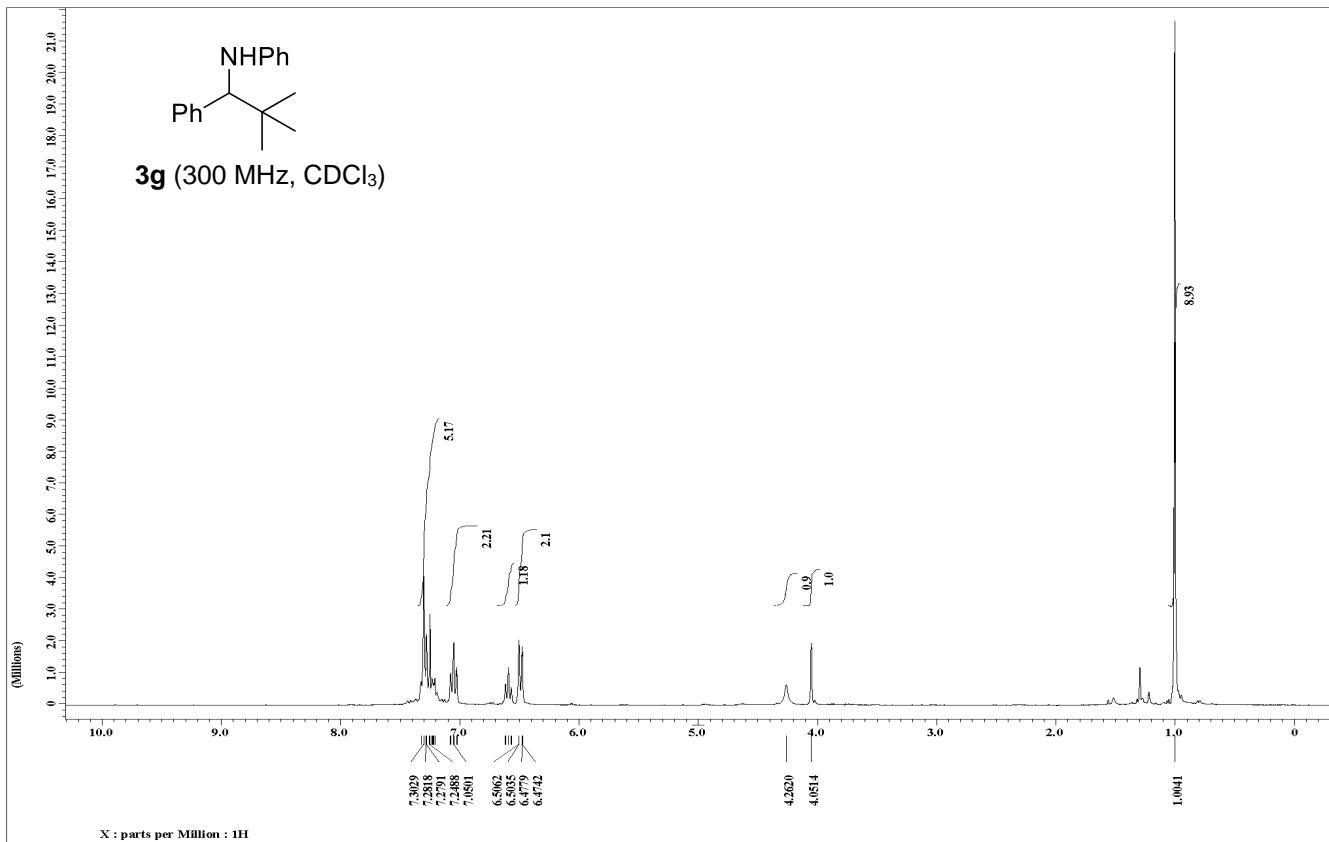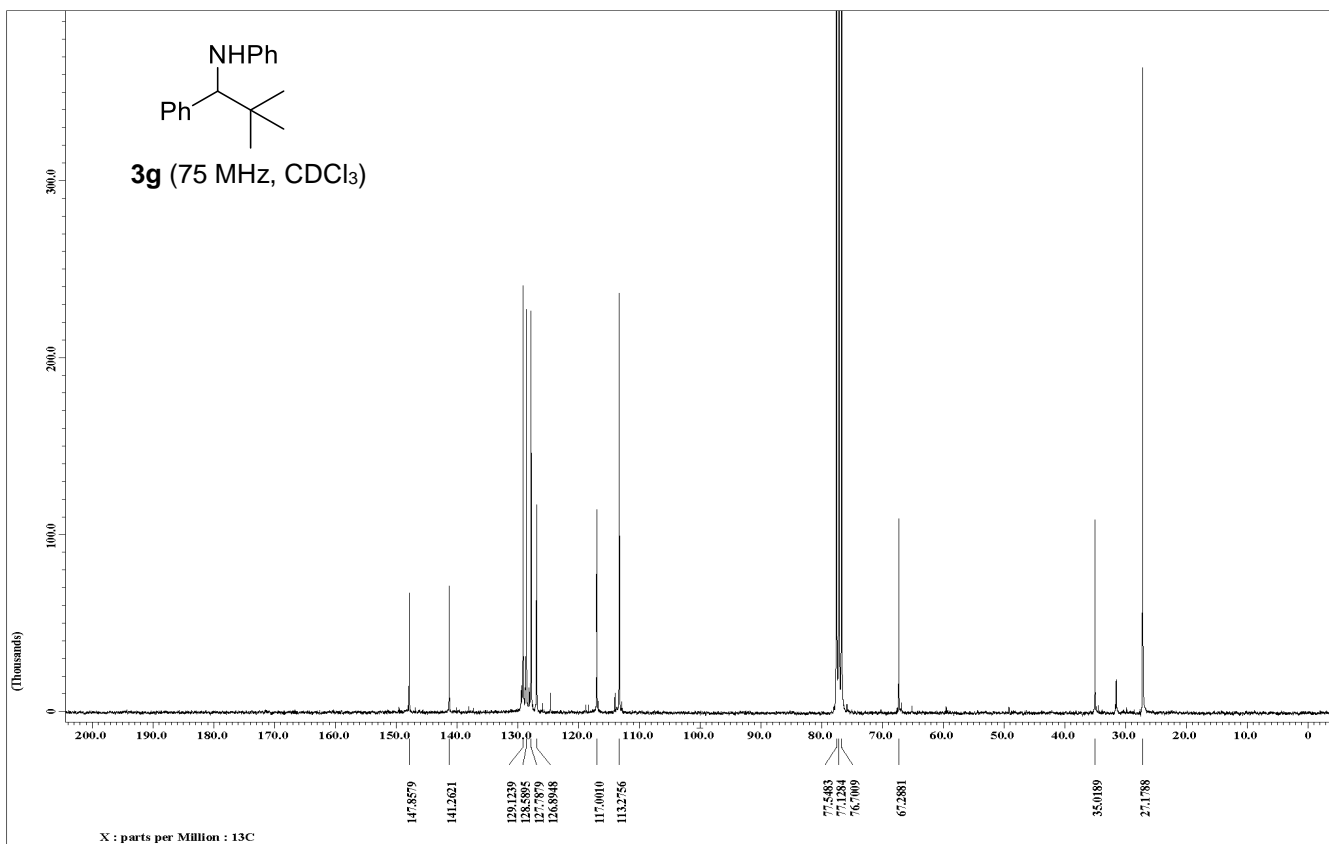

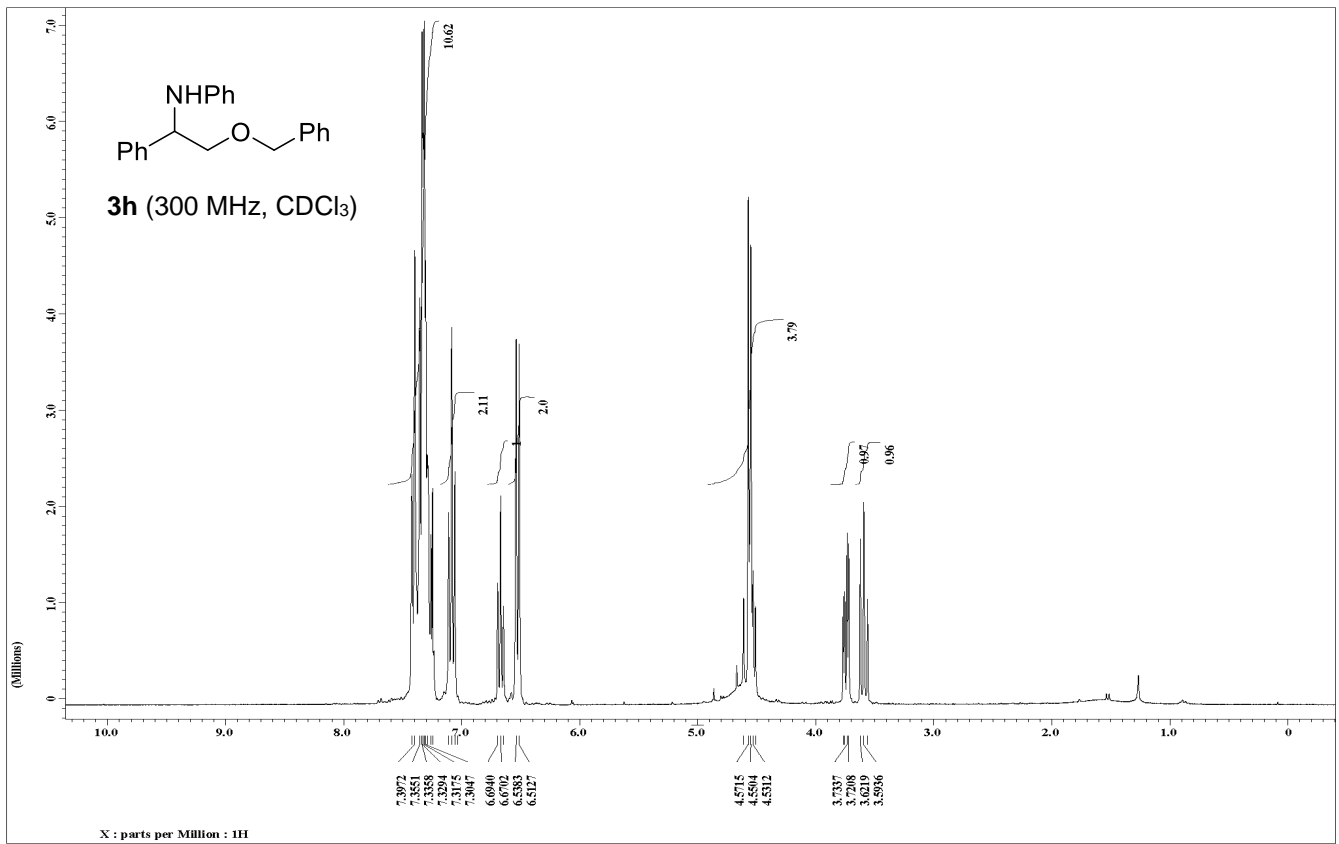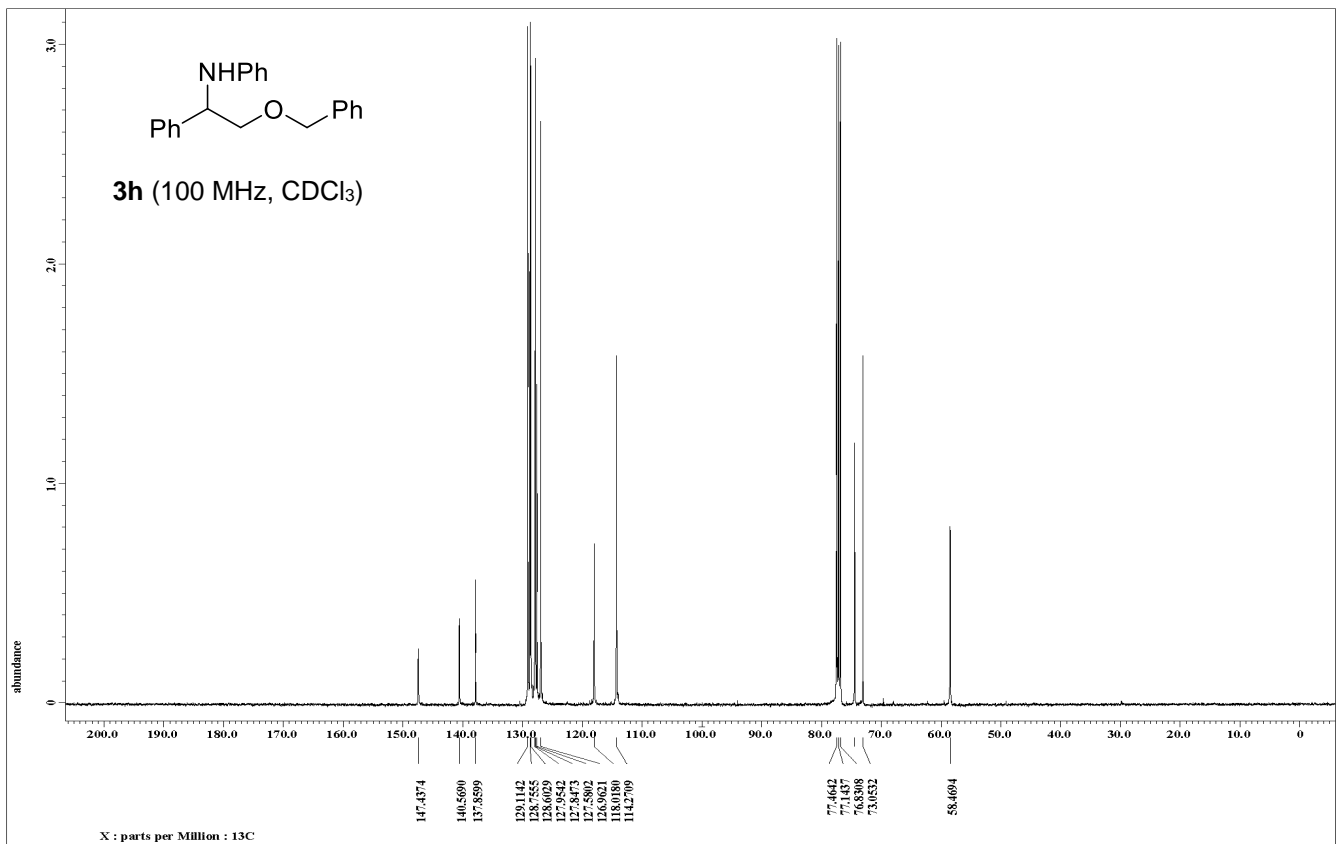



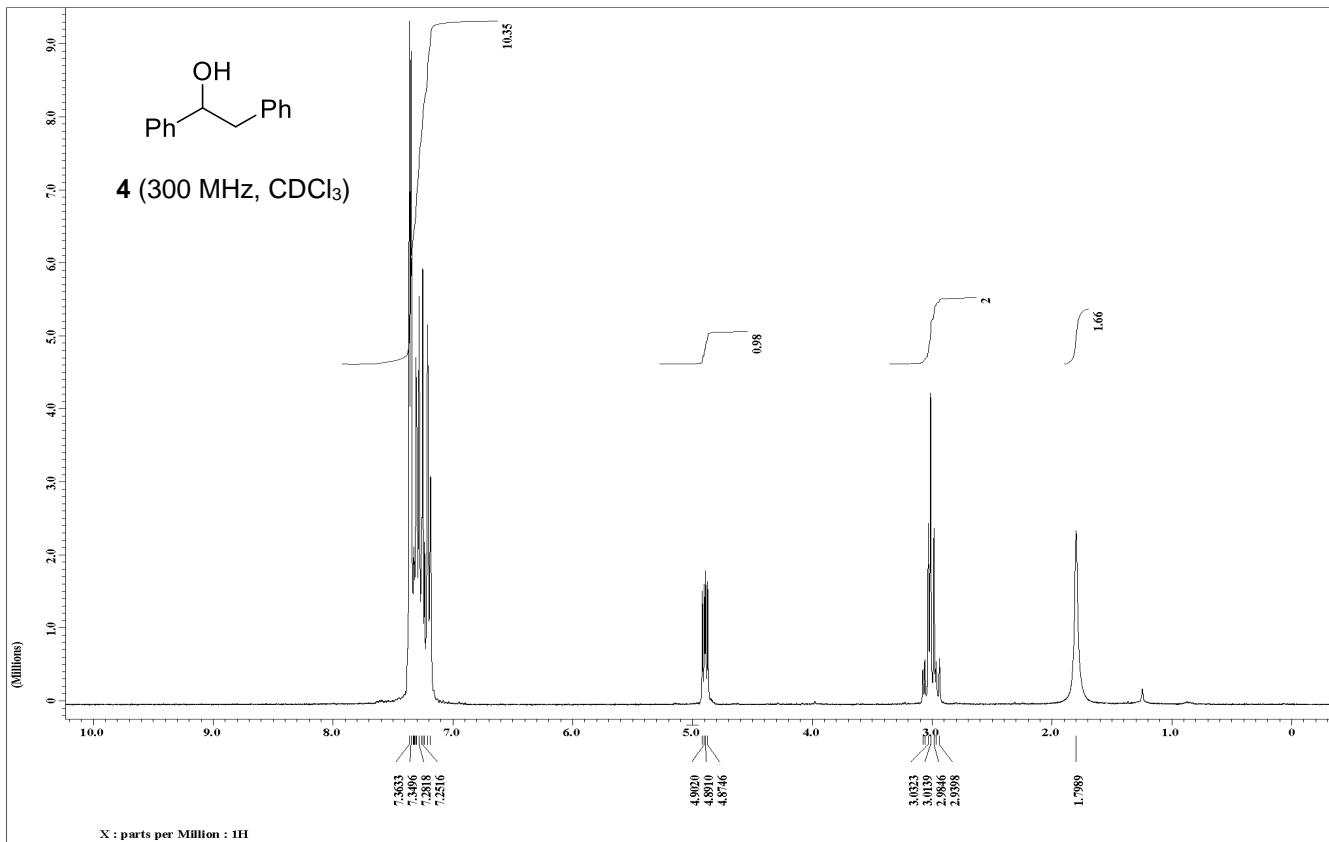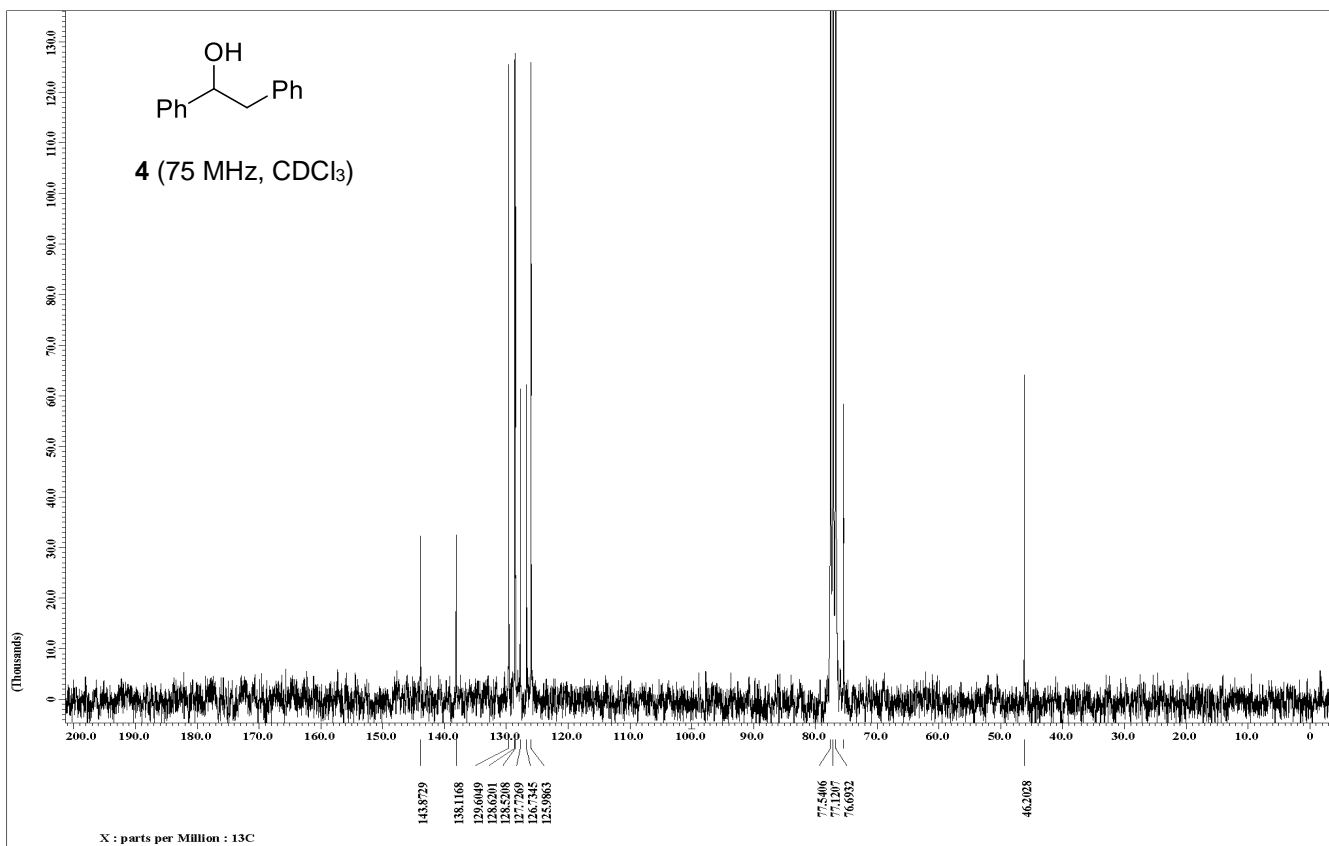

Supplement: NIHMS1024850-supplement-Supplementary_Information.pdf [file NIHMS1024850-supplement-Supplementary_Information.pdf]
